# Supplementary material for: Sensitive tracking of circulating viral RNA through all stages of SARS-CoV-2 infection
Source: JCI journal article supplement (doi:10.1172/jci146031), 2021-02-09
Supplement: sd1 [file 1]

# Supplemental Materials for

## Sensitive tracking of circulating viral RNA through all stages of SARS-CoV-2 infection

Zhen Huang<sup>1,2,3\*</sup>, Bo Ning<sup>1,3\*</sup>, He S. Yang<sup>4,\*</sup>, Brady M. Youngquist<sup>1,3</sup>, Alex Niu<sup>5</sup>, Christopher J. Lyon<sup>1,3</sup>, Brandon J. Beddingfield<sup>6</sup>, Alyssa C. Fears<sup>6</sup>, Chandler H. Monk<sup>7</sup>, Amelie E. Murrell<sup>7</sup>, Samantha J. Bilton<sup>7</sup>, Joshua P. Linhuber<sup>7</sup>, Elizabeth B. Norton<sup>7</sup>, Monika L. Dietrich<sup>8</sup>, Jim Yee<sup>4</sup>, Weihua Lai<sup>2</sup>, John W. Scott<sup>9</sup>, Xiao-Ming Yin<sup>9</sup>, Jay Rappaport<sup>7,10</sup>, James E. Robinson<sup>8</sup>, Nakhle S. Saba<sup>5</sup>, Chad J. Roy<sup>6,7</sup>, Kevin J. Zwezdaryk<sup>7</sup>, Zhen Zhao<sup>4,†</sup>, Tony Y. Hu<sup>1,3†</sup>

<sup>1</sup>Center for Cellular and Molecular Diagnostics, Tulane University School of Medicine, New Orleans, LA 70112, USA.

<sup>2</sup>State Key Laboratory of Food Science and Technology, Nanchang University, Nanchang 330047, China.

<sup>3</sup>Department of Biochemistry and Molecular Biology, Tulane University School of Medicine, New Orleans, LA 70112, USA.

<sup>4</sup>Department of Pathology and Laboratory Medicine, Weill Cornell Medicine, New York, NY, 100065

<sup>5</sup>Section of Hematology and Medical Oncology, Tulane University School of Medicine, New Orleans, LA 70112, USA.

<sup>6</sup>Division of Microbiology, Tulane National Primate Research Center, Covington, LA 70443, USA.

<sup>7</sup>Department of Microbiology and Immunology, Tulane University School of Medicine, New Orleans, LA 70112, USA.

<sup>8</sup>Department of Pediatrics, Tulane University School of Medicine, New Orleans, LA 70112, USA.

<sup>9</sup>Department of Pathology and Laboratory Medicine, Tulane University School of Medicine, New Orleans, LA 70112, USA.

<sup>10</sup>Tulane National Primate Research Center, Covington, LA 70433, USA.

\* These authors contributed equally to this work.

† Correspondence to

Tony Y. Hu

J. Bennett Johnston Building Rm 474

1324 Tulane Ave.

New Orleans, LA 70112

Tel: 504-988-5310

Email: tonyhu@tulane.edu

32 **Supplemental Table 1.** Oligonucleotide sequences used in this study.

| Oligonucleotide ID | Sequence                                                       | Target |
|--------------------|----------------------------------------------------------------|--------|
| ORF1ab-F           | CCCTGTGGGTTTTACACTTAA                                          | ORF1ab |
| ORF1ab-R           | ACGATTGTGCATCAGCTGA                                            | ORF1ab |
| gRNA -ORF1ab       | UAAUUUCUACUCUUGUAGAU <u>CACAUACCGCAGAC</u><br><u>GGUACAGAC</u> | ORF1ab |
| RPP30-F            | CTCGGATCCATCTCACTGCAA                                          | RPP30  |
| RPP30-R            | TGCAACAACATCATAGAGCCG                                          | RPP30  |
| gRNA-RPP30         | UAAUUUCUACUCUUGUAGAU <u>AGAGCAACUUCUU</u><br><u>CAAGGGCCC</u>  | RPP30  |
| Probe              | FAM-TTTTTTTTTTTTT-BHQ                                          |        |

33 Underlined sequence indicates the region complementary to ORF1b or RPP30 target sequences

34 **Supplemental Table 2.** SnapGene (version 5.0.8) *in silico* analysis results for Orf1ab specificity of  
 35 CRISPR-ABC primers and gRNA using the indicated genomic viruses and virus RNA entries for  
 36 SARS-CoV-2 isolates from different countries, other coronaviruses, and common respiratory viruses.

| Virus       | Gene Bank No. | Isolation country | Primer specificity | gRNA specificity |
|-------------|---------------|-------------------|--------------------|------------------|
| SARS-CoV-2  | MN908947.3    | China             | +                  | +                |
|             | LC529905.1    | Japan             | +                  | +                |
|             | MN985325.1    | United States     | +                  | +                |
|             | MT350282.1    | Brazil            | +                  | +                |
|             | MT233519.1    | Spain             | +                  | +                |
|             | MT470100.1    | France            | +                  | +                |
|             | MT007544.1    | Australia         | +                  | +                |
|             | MT324062.1    | South Africa      | +                  | +                |
| SARS-CoV    | NC_004718.3   |                   | -                  | -                |
| MERS-CoV    | NC_019843.3   |                   | -                  | -                |
| HCoV-229E   | NC_002645.1   |                   | -                  | -                |
| HCoV-OC43   | NC_006213.1   |                   | -                  | -                |
| HCoV-HKU1   | NC_006577.2   |                   | -                  | -                |
| HCoV-NL63   | NC_005831.2   |                   | -                  | -                |
| RSV         | NC_001803.1   |                   | -                  | -                |
| Influenza A | NC_002023.1   |                   | -                  | -                |
| Influenza B | NC_002204.1   |                   | -                  | -                |

37 Symbols indicate primers judge able (+) or not able (-) to amplify or bind sequence derived from the  
 38 indicated viruses using following criteria: at least 10 matching bases separated by no mismatches, no  
 39 more than 5 total mismatches, and a  $T_m > 50$  °C.

40 **Supplemental Table 3.** Sources from viruses and viral RNA analyzed in Figure 2B.

| No. | Organism    | Source        | Item.     | Type          |
|-----|-------------|---------------|-----------|---------------|
| 1   | SARS-CoV    | BEI Resources | NR-52346  | Genomic RNA   |
| 2   | MERS-CoV    | BEI Resources | NR-45843  | Genomic RNA   |
| 3   | HCoV 229E   | BEI Resources | NR-52726  | Virus         |
| 4   | HCoV OC43   | BEI Resources | NR-52725  | Virus         |
| 5   | HCoV HKU1   | ATCC          | VR-3262SD | Synthetic RNA |
| 6   | HCoV NL63   | BEI Resources | NR-470    | Genomic RNA   |
| 7   | RSV         | BEI Resources | NR-43976  | Genomic RNA   |
| 8   | Influenza A | BEI Resources | NR-2760   | Genomic RNA   |
| 9   | Influenza B | BEI Resources | NR-10048  | Genomic RNA   |

41

42 **Supplemental Table 4.** Gene targets and analytical sensitivity of reported SARS-CoV-2 nucleic assays.

| Method                | CRISPR-ABC   | RT-qPCR                 | RT-qPCR                         | RT-LAMP          | LAMP-<br>CRISPR | RT-PRA-<br>CRISPR | INSIGHT       |
|-----------------------|--------------|-------------------------|---------------------------------|------------------|-----------------|-------------------|---------------|
| LoD (copies/test) *   | 1            | 5, 16                   | 15                              | 100              | 20              | 50                | 10            |
| LoD (copies/ $\mu$ L) | 0.2          | 1, 3                    | 1.5                             | 20               | 10              | 10                | 10            |
| Volume analyzed       | 5            | 5                       | 10                              | 5                | 2               | 5                 | 1             |
| Virus target gene(s)  | ORF1ab       | N1, N2                  | N                               | Nsp3             | E, N            | RdRP, ORF1ab      | S             |
| Sample type           | Plasma       | Nasal & throat<br>swabs | Nasopharyngeal &<br>nasal swabs | Spiked<br>sample | Nasal swab      | Spiked<br>sample  | Spiked sample |
| Read out              | Fluorescence | Fluorescence            | Fluorescence                    | Colorimetric     | Colorimetric    | Fluorescence      | Fluorescence  |
| Source                | This work    | IDT <sup>#</sup>        | Zymo <sup>\$</sup>              | Journal (1)      | Journal (2)     | Journal (3)       | Journal (4)   |

43 \* LoD (copy/test) was directly reported or calculated using reported LoD concentrations and analyzed sample volumes.

44 <sup>#</sup> Reported LoDs for the CDC 2019-nCoV Real-Time RT-PCR Diagnostic Panel (IDT) with a QIAmp DSP Viral RNA Mini Kit or an EZ1 DSP Kit.

45 <sup>\$</sup> Reported LoD of the Zymo Quick SARS-CoV-2 RT-PCR Kit.

46 **Supplemental Table 5.** Demographic data of the NHP model populations.

| Group | Animal ID | Sex  | Age (years) | Species               |
|-------|-----------|------|-------------|-----------------------|
| 1     | NB86      | Male | 7.53        | African Green Monkey  |
|       | NB78      | Male | 7.53        | African Green Monkey  |
|       | NB76      | Male | 7.53        | African Green Monkey  |
|       | NC06      | Male | 7.53        | African Green Monkey  |
| 2     | KN90      | Male | 7.15        | Indian Rhesus Macaque |
|       | JG28      | Male | 10.18       | Indian Rhesus Macaque |
|       | IR12      | Male | 10.85       | Indian Rhesus Macaque |
|       | IJ01      | Male | 11.15       | Indian Rhesus Macaque |

47

48 **Supplemental Table 6.** Demographics and clinical characteristics of COVID-19 cases analyzed  
 49 in Figure 4 and Supplemental Figure 7.

| <b>Patient Characteristics*</b>                                                                               | <b>Hospitalized<br/>(n=25)</b> | <b>Non-Hospitalized<br/>(n=9)</b> | <b>P-value<sup>#</sup></b> |
|---------------------------------------------------------------------------------------------------------------|--------------------------------|-----------------------------------|----------------------------|
| Age, Median [quartile Q1, Q3]                                                                                 | 68 [57, 74]                    | 40 [36, 46]                       | <0.0001                    |
| Female, n (%)                                                                                                 | 13 (52.0%)                     | 4 (44.4%)                         | 0.6975                     |
| Days from symptom onset to sample collection, Median [Q1, Q3]                                                 | 7 [5, 7]                       | 5 [2, 5]                          | 0.1823                     |
| <b>COVID-19 related symptoms, n (%)</b>                                                                       |                                |                                   |                            |
| Mild symptoms (e.g., fever, cough, fatigue, headache, sore throat, muscle or joint pain, chills or dizziness) | 25 (100%)                      | 9 (100%)                          | -                          |
| Severe symptoms (e.g., shortness of breath, loss of appetite, confusion, persistent chest pain or pressure)   | 19 (76.0%)                     | 4 (44.4%)                         | -                          |
| <b>Oxygen requirement at time of sample collection, n (%)</b>                                                 |                                |                                   |                            |
| Room air                                                                                                      | 4 (16%)                        | -                                 | -                          |
| Ventilator support                                                                                            | 18(72%)                        | -                                 | -                          |
| <b>COVID-19 resolution, n (%)</b>                                                                             |                                |                                   |                            |
| Discharged                                                                                                    | 22 (88%)                       | -                                 | -                          |
| Died                                                                                                          | 3 (12%)                        | -                                 | -                          |

50 \*All COVID-19 cases were diagnosed by positive nasal/nasopharyngeal swab RT-PCR results  
 51 using FDA EUA-approved assays. RT-PCR kit suppliers/designers and their targets were: RealStar  
 52 (S gene and E gene); Cobas (ORF1 a/b and E gene); Panther Fusion (OFR1 a/b gene), Xpert Xpress  
 53 (N2 and E), and the CDC (N1 and N2).

54 <sup>#</sup> P <0.05 by Mann Whitney U test (age and days from symptom onset) or Chi-square tests (sex).

55

56 **Supplemental Table 7.** Detection performance comparison of CRISPR-ABC and RT-qPCR in  
 57 blood collected from 34 COVID-19 patients and 125 non-COVID-19 patients.

| Blood assay results: | COVID-19 Cases | Non-COVID-19 Cases* |
|----------------------|----------------|---------------------|
| CRISPR-ABC Positive  | 31             | 1                   |
| CRISPR-ABC Negative  | 3              | 124                 |
| Sensitivity          | 91.2%          | --                  |
| Specificity          | --             | 99.2%               |
| RT-qPCR Positive     | 15             | 0                   |
| RT-qPCR Negative     | 19             | 125                 |
| Sensitivity          | 44.2%          | --                  |
| Specificity          | --             | 100%                |

58 \* Samples collected before COVID-19 outbreak.

59 # CDC RT-qPCR assay targeting the SARS-CoV-2 N1 gene region.



60 **Supplemental Table 8.** Demographics of children described in Figure 5A.

| Case ID | Age (years) | Sex    | Nasal swab assay* | First nasal swab test results | Days from first nasal swab to first serum sample | First CRISPR-ABC results | First IgG test results # |
|---------|-------------|--------|-------------------|-------------------------------|--------------------------------------------------|--------------------------|--------------------------|
| P1      | 14          | Female | CDC               | Negative                      | 1                                                | Negative                 | Negative                 |
| P2      | 0.5         | Male   | ID NOW            | Negative                      | 1                                                | Negative                 | Negative                 |
| P3      | 12          | Female | CDC               | Negative                      | 1                                                | Negative                 | Negative                 |
| P4      | 14          | Male   | CDC               | Negative                      | 1                                                | Negative                 | Negative                 |
| P5      | 14          | Male   | CDC               | Negative                      | 1                                                | Negative                 | Negative                 |
| P6      | 3.6         | Female | CDC               | Negative                      | 5                                                | Negative                 | Negative                 |
| P7      | 11          | Female | CDC               | Negative                      | 1                                                | Negative                 | Negative                 |
| P8      | 14          | Male   | CDC               | Negative                      | -1                                               | Negative                 | Negative                 |
| P9      | 15          | Female | CDC               | Negative                      | 0                                                | Negative                 | Negative                 |
| P10     | 5           | Male   | ID NOW            | Negative                      | 2                                                | Negative                 | Negative                 |
| P11     | 14          | Male   | ID NOW            | Negative                      | 4                                                | Negative                 | Negative                 |
| P12     | 14          | Female | ID NOW            | Negative                      | 0                                                | Negative                 | Negative                 |
| P13     | 17          | Male   | ID NOW & Cobas    | Negative                      | 0                                                | Negative                 | Negative                 |
| P14     | 10          | Male   | CDC               | Negative                      | 1                                                | Negative                 | Negative                 |
| P15     | 17          | Female | CDC               | Negative                      | 1                                                | Negative                 | Negative                 |
| P16     | 15          | Female | ID NOW            | Negative                      | 0                                                | Negative                 | Negative                 |
| P17     | 15          | Male   | ID NOW            | Negative                      | 0                                                | Negative                 | Negative                 |
| P18     | 17          | Male   | CDC               | Negative                      | 0                                                | Negative                 | Negative                 |
| P19     | 13          | Female | ID NOW            | Negative                      | 0                                                | Negative                 | Negative                 |
| P20     | 14          | Female | ID NOW            | Negative                      | 0                                                | Negative                 | Negative                 |
| P21     | 4           | Female | CDC               | Negative                      | 1                                                | Negative                 | Negative                 |

|     |      |        |        |          |    |          |          |
|-----|------|--------|--------|----------|----|----------|----------|
| P22 | 2.8  | Female | CDC    | Negative | 2  | Negative | Negative |
| P23 | 13   | Female | ID NOW | Negative | 0  | Negative | Negative |
| P24 | 14   | Female | ID NOW | Negative | 0  | Negative | Negative |
| P25 | 4    | Male   | ID NOW | Negative | -3 | Negative | Negative |
| P26 | 13   | Female | ID NOW | Negative | 1  | Negative | Negative |
| P27 | 17   | Female | CDC    | Negative | 1  | Negative | Negative |
| P28 | 1.3  | Male   | ID NOW | Negative | 6  | Positive | Negative |
| P29 | 1.5  | Male   | ID NOW | Negative | 1  | Positive | Positive |
| P30 | 4    | Male   | CDC    | Negative | -5 | Positive | Positive |
| P31 | 6    | Male   | ID NOW | Positive | -9 | Positive | Negative |
| P32 | 0.17 | Female | ID NOW | Positive | 5  | Positive | Positive |

61 \* All these test assays are approved by FDA for EUA. CDC, indicated the CDC RT-qPCR assay that target N1 and N2 gene; ID NOW, indicated ID NOW  
62 COVID-19 assay that target RdRp gene, and the Cobas, indicated Cobas SARS-CoV-2 RT-PCR assay that target ORF1ab and E gene.  
63 # The IgG was tested as described in the Method.

64 **Supplemental Table 9. Potential applications and benefits of CRISPR-ABC.**

| <b>Application</b>  | <b>Potential Benefit</b>                                                                                                                                                                                                                                                                                                                                                                                                                                                                                                                                                                                                                                                                                                                    |
|---------------------|---------------------------------------------------------------------------------------------------------------------------------------------------------------------------------------------------------------------------------------------------------------------------------------------------------------------------------------------------------------------------------------------------------------------------------------------------------------------------------------------------------------------------------------------------------------------------------------------------------------------------------------------------------------------------------------------------------------------------------------------|
| COVID-19 diagnosis  | CRISPR-ABC assays could serve as a secondary COVID-19 diagnostic, particularly for suspected cases with negative RT-qPCR nasal swab results, since detectable levels of SARS-CoV-2 RNA appears to persist longer in the circulation than in nasal tissue and may thus detect ongoing lower respiratory tract or extrapulmonary infections longer detectable by nasal swab RT-qPCR assays.                                                                                                                                                                                                                                                                                                                                                   |
| COVID-19 prognosis  | RT-qPCR studies indicate that the detection and abundance of SARS-CoV-2 RNA in the circulation correlates with and predicts COVID-19 severity. RT-qPCR has poor sensitivity when applied to detect SARS-CoV-2 RNA in serum and plasma samples, limiting the clinical utility of this potential prognostic biomarker. The enhanced sensitivity of CRISPR-ABC assays, however, render such analyses practical.                                                                                                                                                                                                                                                                                                                                |
| COVID-19 evaluation | <p><u>Treatment evaluation:</u> SARS-CoV-2 RNAemia is expected to reflect virus and/or viral RNA shedding from infected pulmonary, and potentially extrapulmonary, tissue that serve as an indicator of disease severity. RNAemia decreases in response to treatment should thus serve as a direct measure of positive treatment responses.</p> <p><u>Disease clearance:</u> SARS-CoV-2 RNAemia may also better reflect disease clearance than nasal swab results, given that viral RNA levels in nasal tissue can decrease well before those in the lower respiratory tract. CRISPR-ABC analysis of plasma or serum samples may thus provide a better means to evaluate disease clearance than RT-qPCR results for nasal swab samples.</p> |

65

66 Supplemental Figure 1.

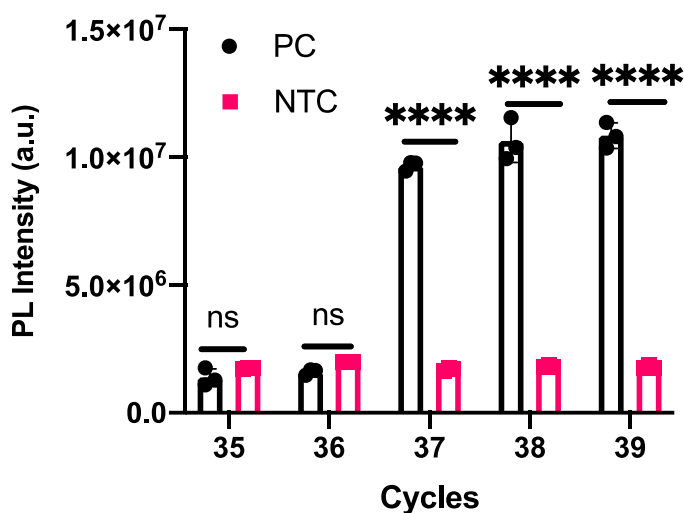

67

68 **Fig. S1.** PCR amplification cycles required for consistent detection a PC (positive control) at a  
69 concentration of 0.2 copy/ $\mu$ L (estimated as single copy target per test). RT-PCR reactions  
70 performed with a synthetic SARS-CoV-2 RNA sample diluted to contain a single target gene  
71 and nuclease-free water (NTC, no template control), using 35+ amplification cycles, and then  
72 directly added to CRISPR Cas12a reactions and analyzed for target-specific fluorescence. Since  
73 fluorescent signal was consistently detected only with  $\geq 37$  PCR cycles, all subsequent assays  
74 used 38 PCR cycles prior to CRISPR detection. Bar graphs represents the mean  $\pm$  SD, of three  
75 technical replicates. (ns,  $p > 0.05$ ; \*\*\*\*,  $p < 0.0001$  by unpaired t-test comparisons between the  
76 PC and NTC samples at different cycles as corrected for multiple comparisons by the Holm-  
77 Sidak method).

78 **Supplemental Figure 2.**

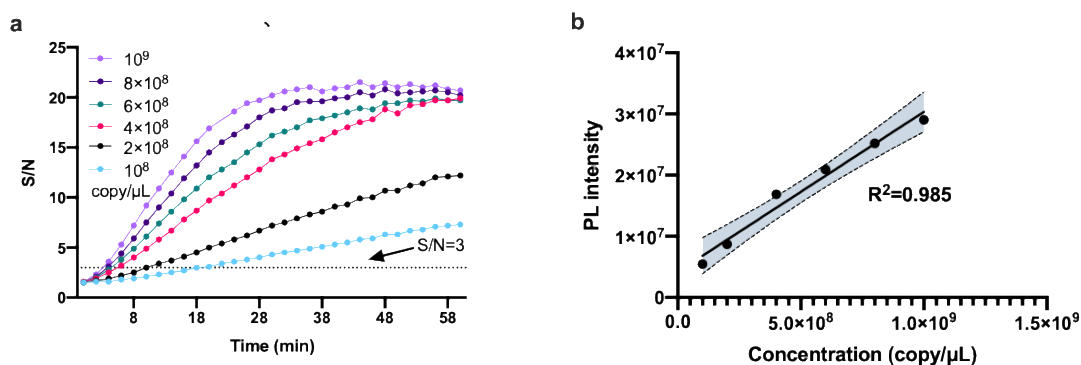

79

80 **Fig. S2.** CRISPR reaction time optimization across a range of input PCR amplicon  
 81 concentrations. **a**, A known amount of the ORF1ab DNA amplicon was spiked into enzyme-  
 82 free RT-PCR reactions and serially diluted to obtain RT-PCR sample-based concentration  
 83 standards (0,  $10^8$ ,  $2 \times 10^8$ ,  $4 \times 10^8$ ,  $6 \times 10^8$ ,  $8 \times 10^8$ , and  $10^9$  copies/ $\mu$ L). A  $20 \mu$ L aliquot of each  
 84 standard was then mixed with  $10 \mu$ L of CRISPR and analyzed every 2 min for 1 h in a plate  
 85 reader that held samples at  $37^\circ\text{C}$  to evaluate CRISPR-mediated probe conversion in response  
 86 to target concentration. CRISPR activity was expressed as signal-to-noise (S/N), using the  
 87 blank (0 copies/ $\mu$ L) sample to evaluate the template-independent change in fluorescence  
 88 background over time. The lowest concentration standard ( $10^8$  copy/ $\mu$ L), representing amount  
 89 of target predicted from a single target, reached the minimum S/N requirement (S/N=3) after  
 90 18 min, and the S/N of highest concentration standard reached a stable plateau at 34 min. **b**,  
 91 CRISPR-mediated fluorescent signal exhibited a strong linear relationship with input template  
 92 concentration when evaluated after 20 min, leading to this time point being chosen all further  
 93 analyses. The shaded area indicates the 95% confidence interval of the fitted line..

94 **Supplemental Figure 3.**

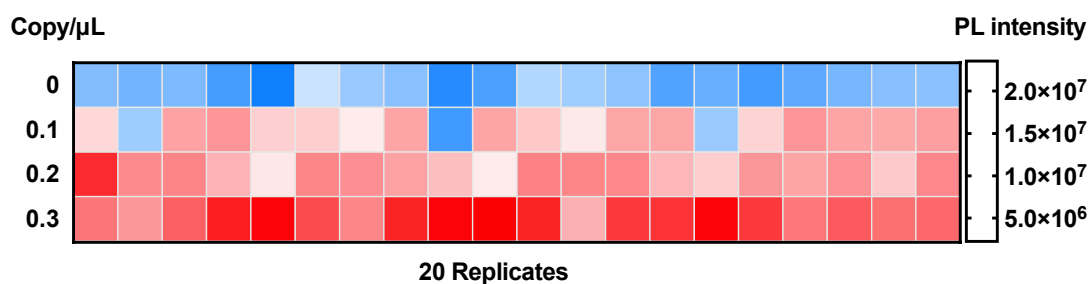

95  
96 **Fig. S3.** Heat map of CRISPR-ABC reproducibility for SARS-COV-2 RNA detection in  
97 replicate samples of healthy human plasma spiked with 0 to 0.3 copies/μL of SARS-CoV-2  
98 RNA. A positive detection rate >95% was not achieved in samples containing < 0.2 copies/μL,  
99 implying the LoD of CRISPR-ABC for SARS-CoV-2 RNA in plasma is approximately 0.2  
100 copies/μL.

101 **Supplemental Figure 4.**

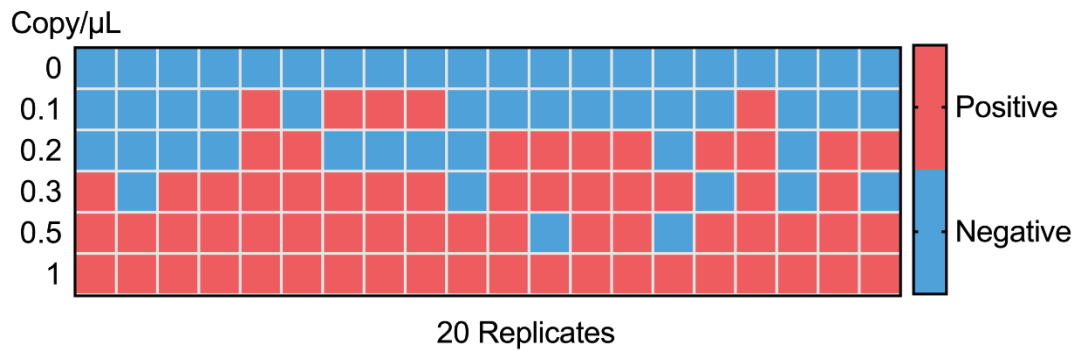

102

103 **Fig. S4.** Schematic of RT-qPCR reproducibility for SARS-COV-2 RNA detection in replicate  
104 samples of healthy human plasma spiked with 0 to 1 copies/μL of heat-inactivated SARS-CoV-  
105 2 virus. RT-qPCR analyses of plasma RNA extracts were performed using the CDC RT-qPCR  
106 kit specific for the N1 gene target region of SARS-CoV-2, and samples with Ct values less than  
107 40 were considered SARS-CoV-2 positive. A positive detection rate >95% was not achieved in  
108 samples containing < 1 copy/μL, implying the limit of detection of RT-qPCR for SARS-CoV-  
109 2 RNA in plasma is approximately 1 copy/μL.

110 **Supplemental Figure 5.**

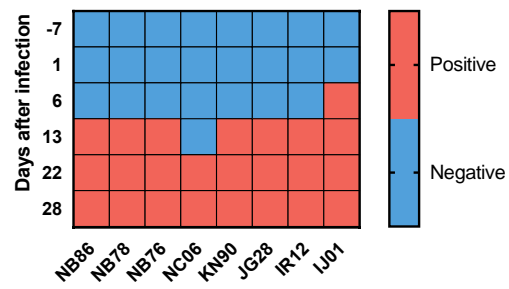

111

112 Fig. S5. Schematic of positive and negative detection of SARS-CoV-2 S protein specific IgM

113 in NHP plasma samples collected at the indicated time relative to SARS-CoV-2 exposure.



114 **Supplemental Figure 6.**

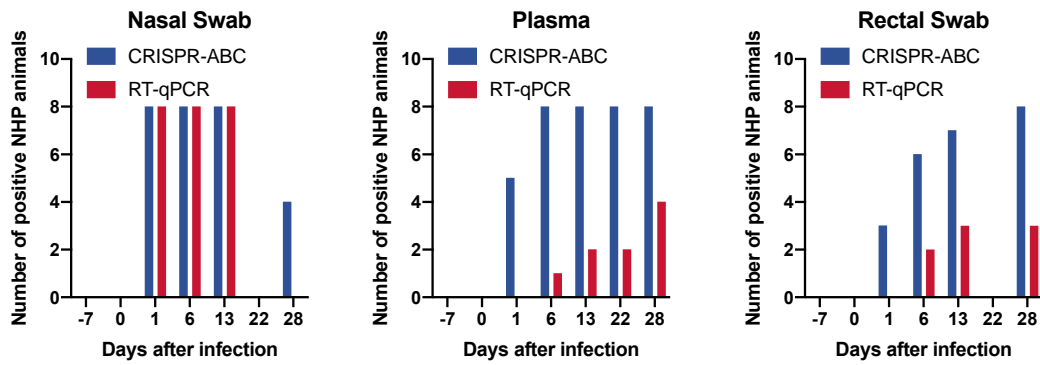

115

116

117

118

119

**Fig. S6.** Comparison of CRISPR-ABC and RT-qPCR positive rates in all NHP plasma and nasal and rectal swab samples shown in **Figure 2B** and **2C**. RT-qPCR analyses of plasma RNA extracts were performed using the CDC RT-qPCR kit specific for the N1 gene target region of SARS-CoV-2, and samples with Ct values less than 40 were considered SARS-CoV-2 positive.

120 Supplemental Figure 7.

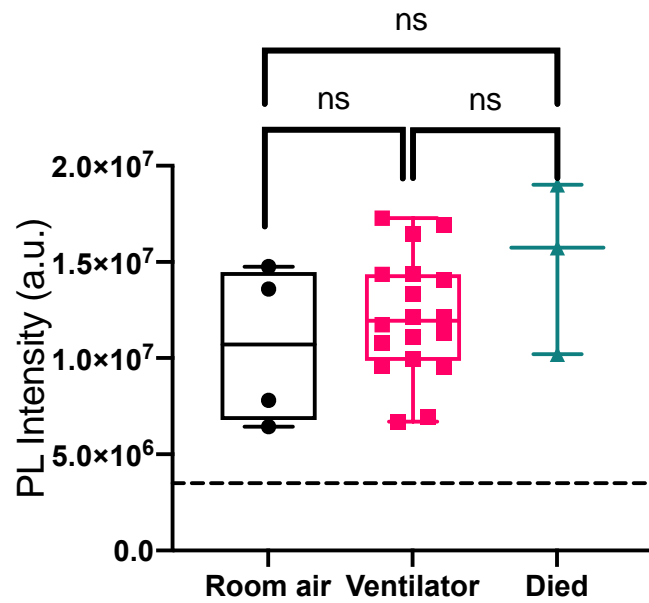

121

122 **Fig. S7. CRISPR-ABC signal from residual blood samples of hospitalized COVID-19**  
123 **patients after their categorization by disease severity.** Patients were segregated by their  
124 disease severity according to their need for oxygen (room air; N=4 or ventilator; N=18) or  
125 failure to recover (died; N=3). Data are presented as box plots indicating the maximum, Q3,  
126 median, Q1, and minimum values of PL intensity for each group, and the mean of triplicate  
127 values for each individual. Dashed line indicates the limit of detection of the CRISPR-ABC  
128 assay; ns,  $p > 0.05$  by one-way ANOVA. CRISPR-ABC signal did not differ by sample type in  
129 this analysis (Supplemental Figure 12).

130 **Supplemental Figure 8.**

A

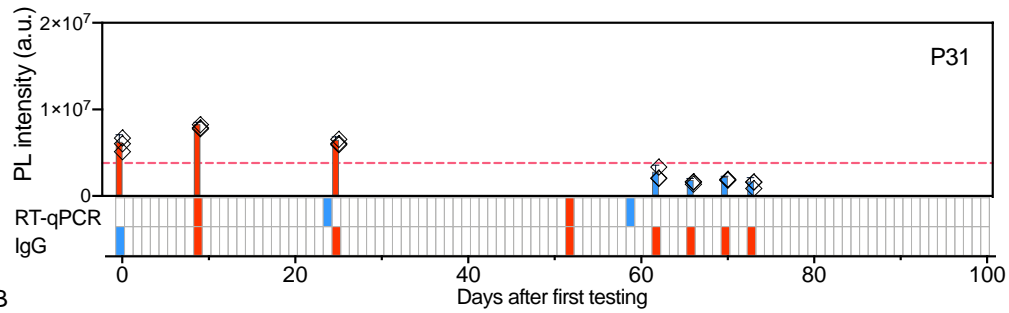

B

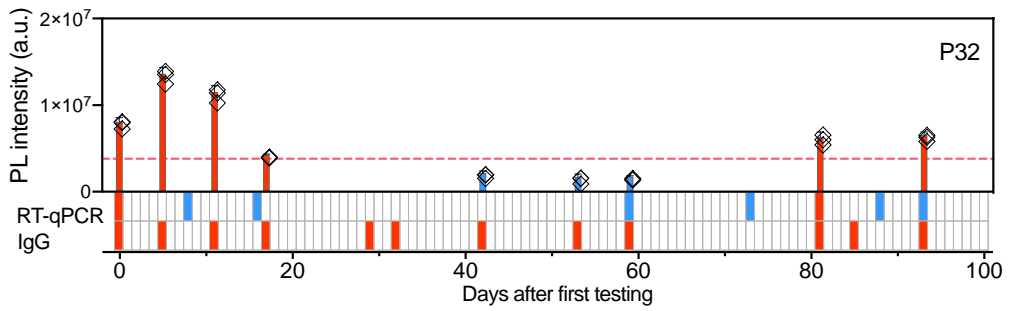

131

132 **Fig. S8. Plasma CRISPR-ABC results of pediatric cases P31 and P32.** Positive (red) and  
133 negative (blue) results for COVID-19 plasma CRISPR-ABC, nasal RT-qPCR, and serological  
134 results at the indicated time points after first evaluation. Data indicate the mean  $\pm$  SD of three  
135 technical replicates, with CRISPR-ABC assay technical replicate values (diamond symbols)  
136 indicated for each analyzed sample.

137 Supplemental Figure 9.

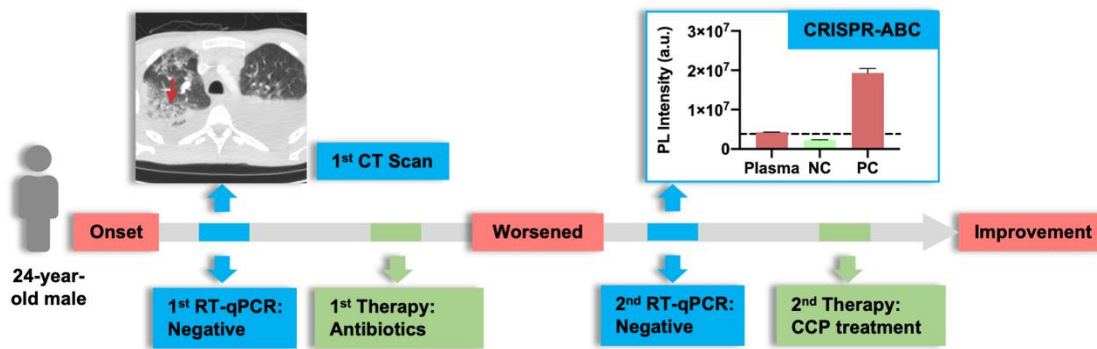

138

139 **Fig. S9.** Case history schematic (not to scale) for a 24-year-old male who presented with  
140 shortness of breath and fatigue, a 3 month history of flu-like symptoms, had a negative result  
141 from nasal RT-PCR test for COVID-19, and was diagnosed with acute myeloid leukemia (AML)  
142 and post-obstructive pneumonia, for which he was admitted to an outside hospital and started  
143 on broad spectrum antibiotics. A chest CT performed at transfer to Tulane revealed ground  
144 glass opacities (red arrow) but nasal and nasopharyngeal RT-PCR results were COVID-19  
145 negative, and he was started on broad spectrum antibiotics for pneumonia. At hospital day 2,  
146 the patient was found to be tachycardiac and hypotensive with increased work of breathing, and  
147 was transferred to the ICU and started on a broader course of antibiotics. A second nasal RT  
148 PCR performed on hospital day 4 again COVID-19 negative, but a retrospective CRISPR-ABC  
149 result for a sample drawn on hospital day 4 was positive. The patient received treatment for  
150 AML from hospital days 3 to 10 post-admission and 1 unit of COVID-19 convalescent plasma  
151 (CCP) on hospital day 5, and revealed significantly improved vitals after initiation of  
152 chemotherapy and CCP. The CRISPR-ABC results present the mean  $\pm$  SD of three technical  
153 replicates for each sample.

154 **Supplemental Figure 10.**

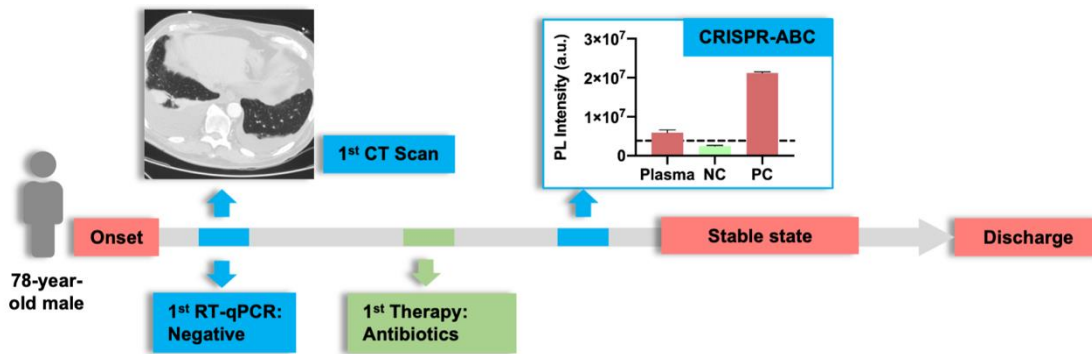

155

156 **Fig. S10.** Case history schematic (not to scale) for a 78-year-old male with history of T-cell  
 157 prolymphocytic leukemia after autologous stem cell transplant, initially presented with fever  
 158 and a 2-week history of fatigue. Chest x-ray was notable only for right pleural effusion, which  
 159 was previously observed at initial diagnosis of T-cell prolymphocytic leukemia. Chest CT  
 160 revealed only bibasilar atelectasis (lower lung collapse) with bilateral small pleural effusions  
 161 (fluid buildup). Nasal RT-PCR (was negative for COVID-19, and the patient was given a dose  
 162 of two antibiotics (vancomycin and cefepime) and continued on cefepime for an additional day  
 163 due to a low absolute neutrophil count ( $1400/\text{mm}^3$ ). A CRISPR-ABC assay retrospectively  
 164 performed on a blood sample drawn on hospital day 2 was positive, but this patient  
 165 demonstrated stable vital signs and did not require any COVID-19 specific treatment prior to  
 166 discharge. The CRISPR-ABC results present the mean  $\pm$  SD of three technical replicates for  
 167 each sample.

168 Supplemental Figure 11.

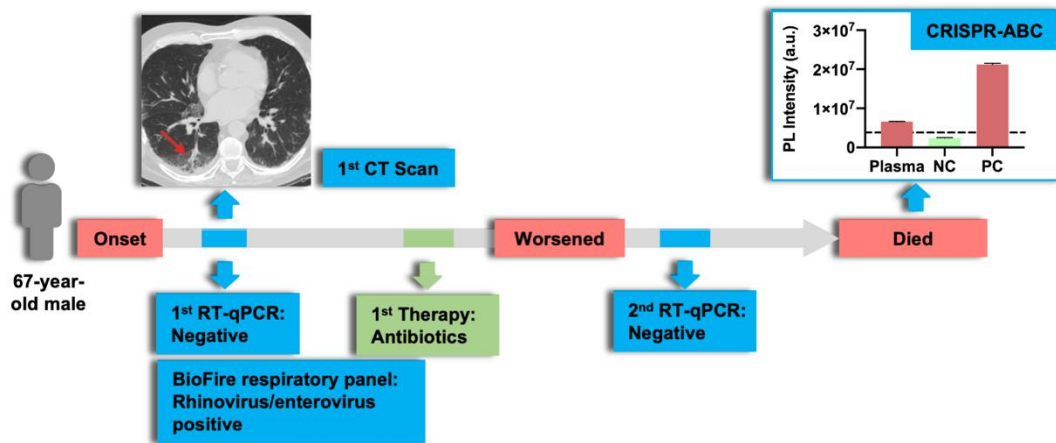

169

170 **Fig. S11.** Case history schematic (not to scale) for a 67-year-old male with a history of acute  
 171 myeloid leukemia evolved from myelodysplastic syndrome following a hematopoietic stem cell  
 172 transplant, presented with a two-day history of shortness of breath, cough, and a worsening skin  
 173 rash. Initial evaluation was unremarkable except for tachycardia to 140 bpm. A chest CT  
 174 revealed ill-defined peribronchovascular opacities in the left upper and lower lung fields (red  
 175 arrow), raising concern for COVID-19, but he tested negative for COVID-19 by  
 176 nasopharyngeal RT-PCR, and positive for rhinovirus/ enterovirus on the BioFire respiratory  
 177 panel. On hospital day 11, his respiratory culture grew multi-drug resistant *Stenotrophomonas*  
 178 *maltophilia*, and he was started on intravenous antibiotics. Despite aggressive antimicrobial  
 179 therapy, his condition continued to worsen, requiring supplemental oxygen. On hospital day 28,  
 180 he developed hypothermia and acute respiratory distress and was transferred to the ICU where  
 181 he was intubated. Bronchoscopy was performed, but no definitive diagnosis was made. RT-  
 182 PCR assays performed on a nasal swab and BAL specimen were COVID-19 negative. Despite  
 183 aggressive antimicrobial therapy and supportive care, he developed multiorgan failure and died  
 184 on hospital day 36. Shortly thereafter, CRISPR-ABC was performed on a blood sample  
 185 collected on hospital day 36, which was positive. The CRISPR-ABC results present the mean  
 186  $\pm$  SD of three technical replicates for each sample.

187 Supplemental Figure 12.

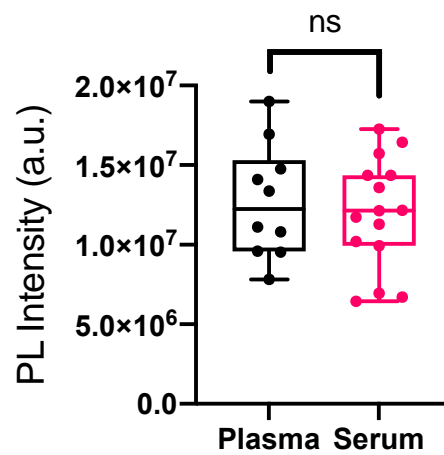

188

189 **Fig. S12.** CRISPR-ABC test results for 10 plasma and 15 serum samples collected from  
190 hospitalized cases. Data are presented as box plots indicating the maximum, Q3, median, Q1,  
191 and minimum values of PL intensity for each group, and also depict the mean of triplicate  
192 values for each individual. (ns,  $P > 0.05$  by Mann Whitney U test)

193

194 **Supplemental Results for the five at-risk cases**

195 Both CRISPR-positive patients who improved after receiving CCP presented with  
196 shortness of breath and had chest CT scans that revealed ground glass opacities  
197 suggestive of COVID-19, but had negative nasal swab RT-qPCR tests results. Each  
198 of these patients also failed to respond to antibiotics administered for pneumonia, but  
199 demonstrated positive responses following CCP therapy. The first case (**Figure 5A,**  
200 **Supplemental Data 2: Case 1**)(5), a 53-year-old female with pre-existing acute  
201 lymphoblastic leukemia (ALL), had multiple negative RT-qPCR results with respiratory  
202 samples obtained following chest radiography results suggestive of COVID-19, and  
203 was therefore started on antibiotic therapy for pneumonia and administered  
204 intravenous immunoglobulin for hypogammaglobulinemia. Over the following 48 hours  
205 her respiratory status worsened to require supplemental oxygen, at which time an  
206 investigational plasma CRISPR-ABC test returned a result positive for SARS-CoV-2.  
207 This patient was then transferred to the COVID-19 isolation ward on suspicion of an  
208 active SARS-CoV-2 infection, received a unit of CCP, and exhibited marked reductions  
209 in her shortness of breath, cough, fever, and supplemental oxygen requirement within  
210 the next 24 hours (**Figure 5A**). Due to continual lingering symptoms, this patient  
211 received an additional unit of CCP 1 week after initial infusion, after which she  
212 continued to improve and was discharged with resolution of all symptoms.

213 The second case (**Supplemental Figure 9, Supplemental Data 2: Case 2**), a 24-  
214 year-old male initially presented to an outside hospital with concern for a new diagnosis



215 of acute myeloid leukemia (AML), and was noted to have had intermittent flu-like  
216 symptoms for roughly 3 months prior to admission in June 2020, at which time he was  
217 found to have a moderate sized pericardial effusion and cardiac tamponade, and a  
218 pericardial window and drain were placed roughly 2 days prior to transfer to Tulane  
219 Medical Center to relieve tamponade physiology. This patient was also diagnosed with  
220 a post-obstructive pneumonia, for which he was started on broad spectrum antibiotics  
221 prior to transfer. Bilateral pleural effusion noted for this case after transfer was  
222 considered likely to have arisen from tamponade physiology, but right upper lobe  
223 ground glass opacities noted on the chest CT in this patient appeared consistent with  
224 COVID-19, and were judged by the attending infectious disease physicians to be less  
225 likely to represent atypical pneumonia. This patient had negative nasal RT-PCR test  
226 results at admission and upon transfer, and worsened following antibiotic treatment,  
227 becoming tachycardiac and hypotensive, demonstrated increased respiratory effort,  
228 and was transferred to the ICU where he was started on a broader course of antibiotics  
229 without major signs of improvement. Workups for other infectious etiologies all came  
230 back negative, and the patient again tested negative for COVID-19 by nasal swab RT-  
231 qPCR, but tested positive upon investigational CRISPR-ABC plasma assay analysis,  
232 and improved upon subsequent treatment with CCP and chemotherapy.

233 Both CRISPR-positive patients who did not receive CCP presented with shortness of  
234 breath or fatigue with CT scans providing evidence consistent with pneumonia or  
235 COVID-19. The first of these cases (**Supplemental Figure 10, Supplemental Data 2:**

236 **Case 3**), a 78-year-old male with a history of T-cell prolymphocytic leukemia, was  
237 noted to have fever, some dyspnea, and fatigue, lower lung collapse with small regions  
238 of bilateral fluid buildup, and to have had close contact with his wife, who had COVID-  
239 19 roughly 6 weeks before he presented with COVID-19-associated symptoms. Prior  
240 to this evaluation, this patient presented with a right lung pleural effusion that was  
241 positive for malignancy, and subsequently developed bilateral pulmonary effusions  
242 that were negative for malignancy and deemed likely to be due to fluid shift from  
243 apheresis and/or known heart failure. This patient lacked CT findings typical of COVID-  
244 19 and tested negative for COVID-19 by nasal swab RT-qPCR, and was therefore  
245 started on antibiotics. He exhibited stable vital signs during his hospitalization, and was  
246 discharged without receiving CCP therapy, but retrospective CRISPR-ABC analysis of  
247 a plasma sample drawn early after hospitalization tested positive for SARS-CoV-2,  
248 suggesting this patient had mild/moderate COVID-19 that resolved without direct  
249 therapeutic intervention.

250 The second case (**Supplemental Figure 11, Supplemental Data 2: Case 4**) had a  
251 history of AML and presented with shortness of breath, cough, a skin rash, tachycardia,  
252 and ill-defined peribronchovascular opacities, but tested negative for COVID-19 by RT-  
253 qPCR, with evidence for rhinovirus/enterovirus infection, and subsequently for a multi-  
254 drug resistant bacterial infection, for which he was started on intravenous antibiotics.  
255 However, this patient exhibited an extended gap between his rhinovirus diagnosis and  
256 his subsequent physiologic deterioration (~28 days) and demonstrated improvement

257 during this intervening period. This patient failed to respond to aggressive antimicrobial  
258 therapy, developed a need for supplemental oxygen that progressed to intubation, and  
259 ultimately died as a result of multi-organ failure. RT-qPCR results for nasal swab and  
260 bronchoalveolar lavage samples obtained during this period did not detect SARS-CoV-  
261 2, but a retrospective CRISPR-ABC assay performed on a plasma sample collected  
262 on the day the patient died was SARS-CoV-2 RNA positive (**Supplemental Figure 11**).  
263 Studies indicate that there is a relatively high rate of SARS-CoV-2 co-infection with  
264 other viruses, with one study reporting a general co-infection rate  $\geq 20\%$  (6) and  
265 another reporting a 6.9% co-infection rate with Enterovirus/Rhinovirus (7), thus it is  
266 plausible that this patient had both infections.

267 The single leukemia patient that did not have a positive CRISPR-ABC result,  
268 demonstrated findings consistent with bacterial infection upon evaluation of her clinical  
269 response. This patient, a 26-year-old female, had a history of AML (**Figure 5B**,  
270 **Supplemental Data 2: Case 5**), and presented with fever, tachycardia and  
271 hypotension, and a right upper lung lobe nodule, but tested negative for COVID-19 by  
272 nasal swab RT-qPCR. She was started on broad spectrum antibiotics and antifungals,  
273 but continued to spike fevers with tachycardia and hypoxia, and a second CT revealed  
274 bilateral diffuse ground glass opacity within the lower lung. However, a second nasal  
275 swab RT-qPCR test for COVID-19 performed on hospital day 6 was negative, as was  
276 a retrospective plasma CRISPR-ABC test. She was continued on broad spectrum  
277 antibiotics with an escalated antifungal treatment, after which she slowly improved,

278 and was discharged for treatment of her AML at another site. Due to the absence of  
279 any CRISPR-ABC or RT-qPCR positive results and a positive response to antibiotics,  
280 this patient was considered not to have had COVID-19.

281 **References:**

- 282 1. Park G-S, Ku K, Baek S-H, Kim S-J, Kim SI, Kim B-T, et al. Development of  
283 Reverse Transcription Loop-Mediated Isothermal Amplification Assays  
284 Targeting Severe Acute Respiratory Syndrome Coronavirus 2 (SARS-CoV-2).  
285 *The Journal of Molecular Diagnostics*. 2020;22(6):729-735.
- 286 2. Broughton JP, Deng X, Yu G, Fasching CL, Servellita V, Singh J, et al.  
287 CRISPR–Cas12-based detection of SARS-CoV-2. *Nature Biotechnology*.  
288 2020;38:870-874.
- 289 3. Lucia C, Federico P-B, and Alejandra GC. An ultrasensitive, rapid, and portable  
290 coronavirus SARS-CoV-2 sequence detection method based on CRISPR-Cas12.  
291 *bioRxiv*. 2020.
- 292 4. Wu Q, Suo C, Brown T, Wang T, Teichmann SA, and Bassett AR. INSIGHT:  
293 a scalable isothermal NASBA-based platform for COVID-19 diagnosis. *bioRxiv*.  
294 2020:2020.2006.2001.127019.
- 295 5. Niu A, McDougal A, Ning B, Safa F, Luk A, Mushatt DM, et al. COVID-19 in  
296 allogeneic stem cell transplant: high false-negative probability and role of  
297 CRISPR and convalescent plasma. *Bone Marrow Transplant*.  
298 2020;55(12):2354-2356.
- 299 6. Chen X, Liao B, Cheng L, Peng X, Xu X, Li Y, et al. The microbial coinfection  
300 in COVID-19. *Appl Microbiol Biotechnol*. 2020;104(18):7777-7785.
- 301 7. Kim D, Quinn J, Pinsky B, Shah NH, and Brown I. Rates of Co-infection  
302 Between SARS-CoV-2 and Other Respiratory Pathogens. *JAMA*.  
303 2020;323(20):2085-2086.

304
