# Supplementary material for: Sensitive tracking of circulating viral RNA through all stages of SARS-CoV-2 infection
Source: JCI journal article supplement (doi:10.1172/jci146031), 2021-02-09
Supplement: sd3 [file 3]

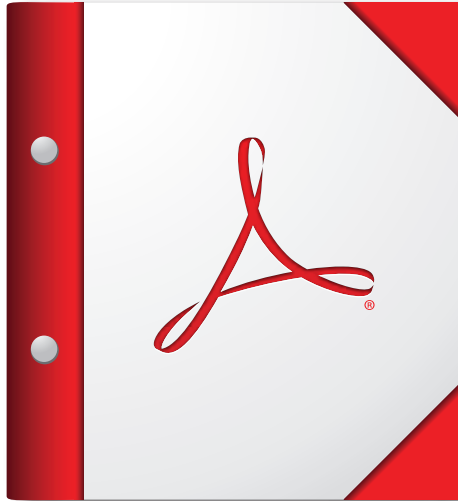

**For the best experience, open this PDF portfolio in  
Acrobat X or Adobe Reader X, or later.**

**Get Adobe Reader Now!**
